# Supplementary material for: Synthesis of strontium hexaferrite nanoplates and the enhancement of their electrochemical performance by Zn2+ doping for high-rate and long-life lithium-ion batteries
Source: Royal Society of Chemistry journal article supplement (doi:10.1039/c7nj01036b), 2017-01-01
Supplement: c7nj01036b1.pdf [file c7nj01036b1.pdf]

## Supporting Information

### **Synthesize of Strontium Hexaferrite Nanoplates and its Enhanced Electrochemical Performances by Zn<sup>2+</sup> Doping for High-Rate and Long-Life lithium-Ion Batteries**

Chenxi Hu, Song Qiu, Nannan Wu, Hailong Lyu, Huili Cao, Shimei Guo and Jirong Liu,\*

Key Laboratory for Liquid–Solid Structural Evolution and Processing of Materials, Ministry of Education and School of Materials Science and Engineering, Shandong University, Jinan, Shandong 250061, China

**\* Corresponding Author**

E-mail: [jrliu@sdu.edu.cn](mailto:jrliu@sdu.edu.cn) (J. L.); Tel.: +86-531-88390236 (J. L.)

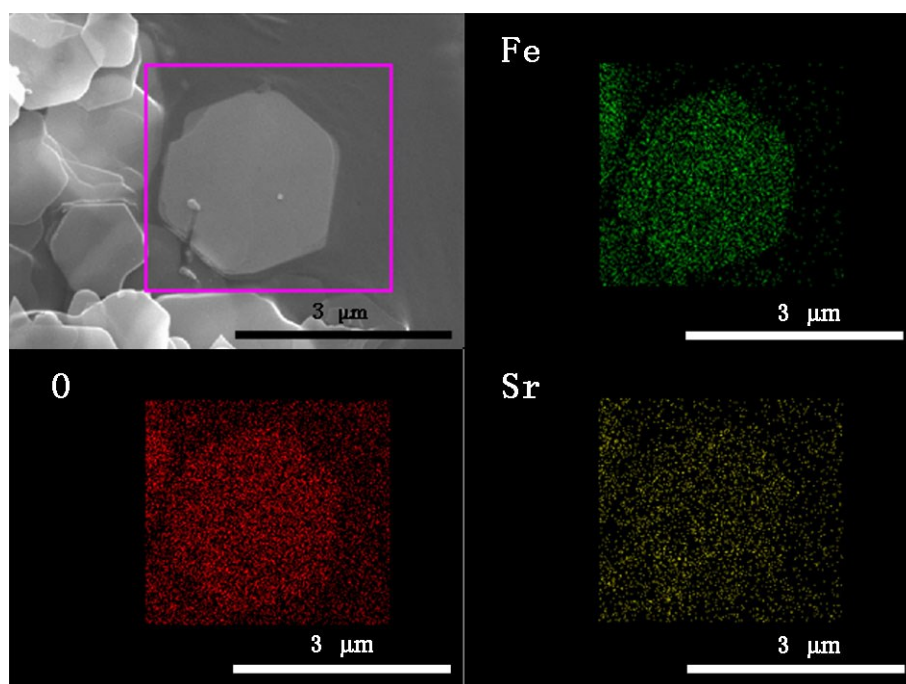

**Fig. S1** SEM and EDX mapping images (Fe, O, Sr) of  $\text{SrFe}_{12}\text{O}_{19}$  nanoplates.

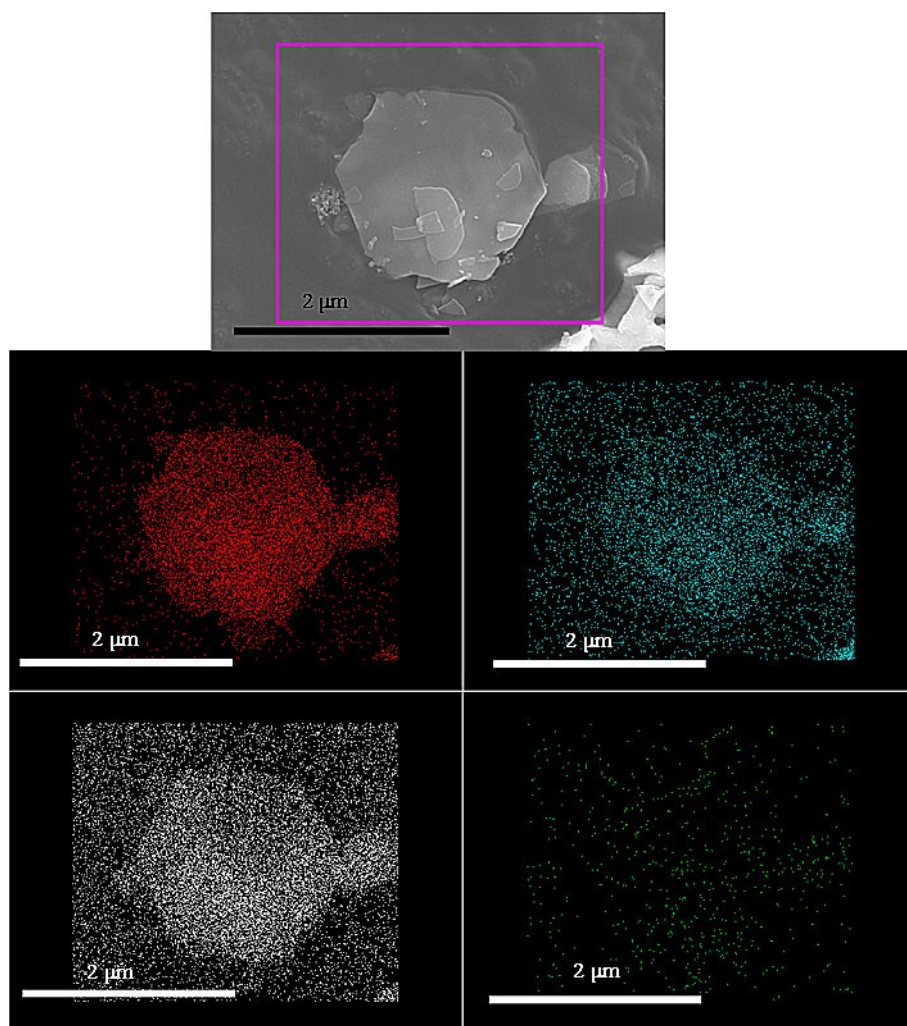

**Fig. S2** SEM and EDX mapping images (Fe, O, Sr, Zn) of  $\text{Zn}^{2+}$ -doped  $\text{SrFe}_{12}\text{O}_{19}$  nanoplates.

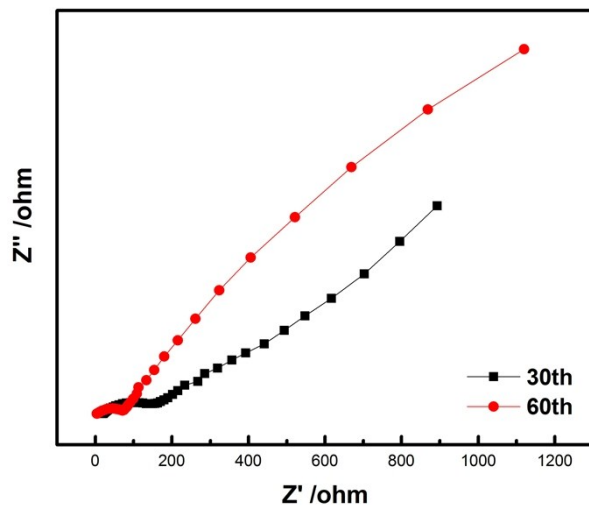

**Fig. S3** Nyquist plots of  $\text{Zn}^{2+}$ -doped  $\text{SrFe}_{12}\text{O}_{19}$  anodes after 30<sup>th</sup> and 60<sup>th</sup> discharge/charge process at a current density of  $100 \text{ mA g}^{-1}$ .
